# Supplementary material
Source: publisher figshare collection journal article supplement (https://tandf.figshare.com/ndownloader/files/21747468)
Supplement: Supplementary file 1 [file 21747468]

5-FU iv

5-FU civ

L-OHP

HD session

l-LV

7 h

3 h

48 h

2 h

0 h

Every 2 weeks

FOLFOX

| Base  regimen | L-OHP  (85 mg/m2) | 5-FU iv  (400 mg/m2) | 5-FU civ  (2,400 mg/m2) | l-LV  (200 mg/m2) |
| --- | --- | --- | --- | --- |
| 1st cycle | 50% reduced dose  42.5 mg/m2 | 50% reduced dose  200 mg/m2 | 50% reduced dose  1,200 mg/m2 | 100%  200 mg/m2 |
| 2nd-3rd cycle | 30% reduced dose  59.5 mg/m2 | 30% reduced dose  280 mg/m2 | 30% reduced dose  1,680 mg/m2 | 100%  200 mg/m2 |

5-FU: 5-Fluorouracil, L-OHP: Oxaliplatin, l-LV: l-leucovorin, h: hour, iv: intravenous infusion, civ: continuous intravenous infusion, HD: hemodialysis

Supplementary. Schema of Dose and HD schedule

Supplementary Material
